# 1 Using Citizen Science to build baseline data on tropical tree phenology

2 Geetha Ramaswami<sup>1</sup>, Swati Sidhu<sup>1</sup>, Suhel Quader<sup>1</sup>

3 <sup>1</sup> Nature Conservation Foundation, 1311, "Amritha", 12th Main Vijayanagar 1st Stage, Mysore 570 017,  
4 India

5 **Email:** [geetha@ncf-india.org](mailto:geetha@ncf-india.org)

6

## 7 **Abstract**

8 Large-scale and long-term understanding of the phenology of widespread tree species is lacking in the  
9 tropics, and particularly in the Indian subcontinent. In the absence of baseline information, the impacts of  
10 climate on tree phenology, and thus on trophic interactions downstream of tree phenology, are also poorly  
11 understood. Citizen scientists can help bridge this gap by contributing simple, technology-based  
12 information over large spatial scales and over the long term. In this study, we describe an India-wide  
13 citizen science initiative called SeasonWatch, with preliminary insights into contributor behaviour and  
14 species phenology. Over a period of 8 years, between 2011 and 2019, cumulative contributor numbers  
15 have increased every year, although consistent contribution remains constant and low. The phenological  
16 patterns in the 4 most-observed species (Jackfruit *Artocarpus heterophyllus* Lam., Mango *Mangifera*  
17 *indica* L., Tamarind *Tamarindus indica* L., and Indian Laburnum *Cassia fistula* L.) are described, with  
18 discernible seasonal peaks in flowering and fruiting. Seasonal peaks are influenced by tree phenology  
19 reported in the south Indian state of Kerala, which has the maximum number of contributors and most  
20 number of observations per contributor, comprising 89% of all observations. We look in detail at the  
21 flowering phenology of one particular species, *Cassia fistula*, which appears to show aberrant phenology,  
22 reflecting a potential shift away from historical baselines. Latitudinal patterns in the phenology of

23 widespread species such as *Mangifera indica* are also discernible from 4 seasonal bioblitz events  
24 organised during 2018-19, with trees in lower latitudes exhibiting flowering and fruiting phenology  
25 earlier than the higher latitudes. We conclude that there are signs of shifts in phenological patterns, as in  
26 the case of *C. fistula*, and extend a call for action to sustain long-term interest and participation by  
27 contributors to develop a baseline for common tropical tree species that can be used to understand long-  
28 term consequences of climate change on tropical tree phenology.

## 29 **Introduction**

30 Cyclic patterns of growth and reproduction - or phenology - of living organisms are seasonal and highly  
31 sensitive to the environment (Sparks and Carey, 1995). Discernible changes outside of the known  
32 variability in the phenology of organisms are often indicative of underlying changes in large-scale climate  
33 patterns. In temperate regions, higher temperatures are related to the onset of spring phenophases, such as  
34 flowering and leaf unfolding (Menzel et al 2006). Increasingly, dates of bud-burst have been  
35 demonstrated to advance when compared with long-term averages due to advancement in the warmer  
36 season, increase in winter and spring temperatures, and even effects of urbanisation such as pavements  
37 and light at night-time (e.g. Menzel et al 2006, Fu et al 2012, Chen et al 2016, French-Constant et al  
38 2016). In the tropics, recent long-term phenological studies have shown that the onset, persistence and  
39 frequency of reproductive phenophases are affected by solar irradiance (Babweteera et al. 2018; Chapman  
40 et al. 2018; Wright and Calderón 2018). In other tropical systems, reproductive phenology has been  
41 reported to be affected by precipitation; fruiting intensity often increases with higher rainfall (Dunham et  
42 al. 2018; Mendoza et al. 2018). However, the impacts of changes in baseline environmental conditions on  
43 tropical tree phenology are poorly understood.

44 The bulk of our understanding of phenological patterns in plants, and their response to climatic change,  
45 comes from Europe and North America (Bertin 2008). Apart from contemporary studies, this  
46 understanding is supplemented by a number of historical data sets collected by hobbyists and naturalists,

47 that serve as baselines for comparing current phenological patterns (the Marsham phenological record, see  
48 Sparks and Carey, 1995). Some of the largest historical datasets on phenology are from temperate regions,  
49 including the Kyoto cherry blossom dataset which is over 1300 years old (Aono and Kazui, 2008). Most  
50 contemporary phenology monitoring networks are also situated in temperate latitudes (Cleland 2007).  
51 Information on tropical phenology is lacking both in contemporary as well as historical studies, and large-  
52 scale or generalizable responses to climate are not known (Kushwaha and Singh, 2008).

53 Arriving at generalizable trends for phenological responses to climate requires data collected over large  
54 spatial scales and over multiple years, and integrating different datasets (Morisette et al 2008). Intensive  
55 research efforts at such scales are often not possible due to resource and personnel limitations. Large-  
56 scale, long-term observations, however, can be facilitated by citizen scientists (Schwartz, Betancourt, and  
57 Weltzin, 2012). Citizen science involves members of the public in scientific studies to collectively  
58 generate information around issues of larger public concern. The term, initially coined by the Cornell Lab  
59 of Ornithology in 1995 (Bonney 2016), has since been used to include a multitude of projects such as  
60 mapping and documenting biodiversity (iNaturalist, Project Noah, PlantWatch, eBird), population  
61 dynamics (StreamWatch), bird migration (North American Bird Phenology Program), and plant  
62 phenology (Nature's Calendar, SeasonWatch). Citizen science projects are designed such that interested  
63 people, with or without a formal training in science, volunteer their time and collect information required  
64 to build and co-create datasets of interest (Dickinson et al 2012, Wiggins and Crowston 2011).

65 Worldwide, citizen science initiatives have contributed to large-scale understanding of phenology,  
66 including the quantification of climate change impacts on plant phenology. For instance, under different  
67 climate change scenarios, the flowering and fruiting phenology of *Vaccinium membranaceum* is predicted  
68 to advance on average by 35 and 36 days respectively in the USA. These predictions are based on the  
69 current understanding of the environmental correlates of reproductive phenology of *V. membranaceum*  
70 from data contributed to the citizen science initiative USA National Phenology Network along with other  
71 long-term data sources (Prevey et al 2020).

72 Within India, multiple past or ongoing efforts have gathered long-term phenology data in different sites  
73 that is contextualized for the region and for the species occurring therein (Ramaswami et al 2019).  
74 Among them, SeasonWatch, a citizen science initiative that started in 2010, is collating data on phenology  
75 of common Indian trees at a country-wide level, with the ultimate aim of understanding geographical  
76 variation and the effects of climate change on the phenology of widespread species. Apart from the  
77 formal literature (floras, scientific articles, tree guides etc.), there is also anecdotal and cultural  
78 information on the expected phenology of trees. For instance, the festival of Vishu (typically in the 15th  
79 week of the year, between 13 and 15 April) in Kerala is associated with flowering in *Cassia fistula*, with  
80 inflorescences forming an integral part of the festivities. In recent years, there have been anecdotal and  
81 media reports in Kerala, of the flowers of *C. fistula* being unavailable during the festival of Vishu, as well  
82 as aberrant flowering during other times of the year.

83 Here, we describe SeasonWatch as an attempt to create a baseline dataset on tropical tree phenology using  
84 citizen science. We illustrate this by exploring phenological patterns of selected tree species across space  
85 and time. We also summarise contributor history and consistency (details in Methods section), regional  
86 representation of trees, and assess whether SeasonWatch data can be used to understand probable shifts in  
87 phenological patterns of trees in the future. Specifically, we provide summaries of 1) contributor  
88 behaviour in the context of data upload patterns, 2) tree behaviour and phenological patterns over time,  
89 3) flowering phenology of *C. fistula* over time, 4) phenological patterns over space using data for  
90 *Mangifera indica*. We conclude with potential research questions of interest in the future.

91

92 **Methods:**

93 [Project summary](#)

94 We summarise data contributed to SeasonWatch over a period of six years between 1 January 2014 and  
95 31 December 2019. Data contribution requires registration with the SeasonWatch project. Registered  
96 contributors upload information on the phenology of 136 common, widespread (or locally abundant),  
97 native and non-native (planted along avenues and roadways, or invasive species of concern) woody plant  
98 species (list available at [www.seasonwatch.in/species.php](http://www.seasonwatch.in/species.php)), via the project website ([www.seasonwatch.in](http://www.seasonwatch.in))  
99 or a freely downloadable Android mobile phone app.

#### 100 Contributor summary

101 SeasonWatch has two main types of contributors: schools (teachers and students, typically of grades 6-9)  
102 and individuals (nature enthusiasts; students at universities). School teachers learn about participating in  
103 the project through state and district-level teacher-training workshops, or through workshops at schools,  
104 and implement the project in their school premises with groups of students. SeasonWatch typically  
105 partners with a regional organisation in order to facilitate local outreach and training.

106 Contributors can choose to make an observation on a tree only once ('Casual' henceforth) or register a  
107 tree with the project and make observations on its phenology every week ('Regular' henceforth). A large  
108 proportion of the Regular data is contributed by schools and these data are consistently received  
109 throughout the school year. Regular observations allow for understanding individual-level variation in  
110 seasonal phenology of trees, keeping location constant. Casual observations have been collected largely  
111 through four 'bioblitz' events held in December 2018, and in March, June, and September 2019. The aim  
112 of the 4-day 'bioblitz' events was to create a snapshot of phenology across India in different seasons.  
113 Casual observations allow for understanding latitudinal variation in species phenology.

#### 114 Observations summary

115 Each contributed data point contains the following information - tree location, date and time of  
116 observation, date of upload, species identity, and an estimate of leaf, flower and fruit quantity on the

117 observed tree. ‘Leaf’, ‘flower’ and ‘fruit’ are further categorised into finer phenological stages (Table 1).  
118 The quantity of each phenophase is noted as one of the following - ‘None’, ‘Few’ or ‘Many’. ‘None’  
119 corresponds to the absence of the phenophase. If a phenophase is observed on 1/3rd or less of the tree  
120 canopy, it is marked as ‘Few’ by a contributor, indicating a lower volume of the tree having the reported  
121 phenophase. If a phenophase is observed on more than 1/3rd of the tree canopy, it is marked as ‘Many’ by  
122 a contributor, indicating a larger volume of the tree having the reported phenophase. ‘Many’ is considered  
123 as the phenophase peak at the level of each individual tree. On any given day, only one of these categories  
124 can be reported for a phenophase. Along with phenology observations, contributors can optionally note  
125 the presence of herbivores, pollinators and dispersers, and also make additional notes on natural history,  
126 interactions of interest etc. All phenology data contributed to SeasonWatch are available to any  
127 contributor or non-contributor, upon request.

128 Based on these contributed observations, we quantify the following:

129 *1) Contributor behavior and data upload patterns*

130 We summarise contributor behaviour in the form of overall participation (in making Regular and Casual  
131 observations) from each Indian state, and for each year. We quantify contributor consistency as a measure  
132 of continuity in Regular observations on registered trees. A contributor is defined as ‘consistent’ if she  
133 makes phenology observations in 23 or more unique weeks in a year.

134 *2) Tree behaviour and phenological patterns over time and space*

135 We summarise average weekly phenological responses of tree species over a period of 6 years. We  
136 assessed Regular phenology data for patterns of phenology using data contributed between 1 January  
137 2014 and 31 December 2019. Since contributors are encouraged to record phenology once a week, we  
138 also consider the week as the smallest unit of time to report average patterns across species. Tree  
139 behaviour was quantified as the average proportion of trees displaying a particular phenophase in a week.

140 3) *Flowering in Cassia fistula*

141 We assessed long-term patterns of flowering in *C. fistula*, by combining Regular and Casual data for this  
142 species between 2014 and 2019. Tree behaviour was measured as the proportion of trees displaying the  
143 floral phenophase ‘open flower’, comparing seasonal patterns in any flowering (i.e., open flowers stages  
144 reported as ‘few’ or ‘many’) with those in full bloom (i.e., ‘open flowers’ reported as ‘many’). The  
145 denominator in these proportions is the total number of individuals for which phenology was reported in  
146 each week. We visually compare peaks in the proportion of trees showing any flowering with those that  
147 were reported as being in full bloom to understand whether overall flowering patterns in *C. fistula* are  
148 different from that which is anecdotally expected.

149 4) *Patterns over space*

150 Country-wide spatial phenological patterns in tree phenology were based only on Casual observations  
151 during the four bioblitz events. We plotted the spatial locations of phenophases of interest in the most  
152 observed species on a map to understand latitudinal variation in species phenology.

153

154 Table 1: Tree phenophases recorded by citizen scientists in SeasonWatch. Phenophases are recognised  
155 based on descriptors

| Phenological indicator | Phenophase | Descriptors                                                       |
|------------------------|------------|-------------------------------------------------------------------|
| Leaf                   | Fresh      | Leaf bud; recently emerged; small-sized; light green or pigmented |
|                        | Mature     | Full-sized; dark green                                            |
|                        | Dying      | Necrotic; discoloured; extreme herbivory                          |

|        |         |                                     |
|--------|---------|-------------------------------------|
| Flower | Bud     | Floral bud                          |
|        | Male*   | Androecium only, corolla unfurled   |
|        | Female* | Gynoecium only, corolla unfurled    |
|        | Open    | Bisexual flowers, corolla unfurled  |
| Fruits | Unripe  | Small-sized; dark green             |
|        | Ripe    | Full-sized; mature fruit coloration |
|        | Open*   | Fruit opened, seeds dispersed       |

156 \*Phenophase present only in a few species. ‘Dying’ Leaf and ‘Open’ fruit phenophases were introduced  
157 in the year 2018 in order to capture deciduousness and seasonal splitting of pods/capsules respectively of  
158 certain species.

159

## 160 **Results:**

161 We summarise the overall and regional patterns of contributors and species phenology in SeasonWatch.  
162 Since 2011, 1050 individuals together with students from 889 schools from across India have contributed  
163 351,481 phenology observations. Of these, 283,940 are repeat observations on registered trees, while  
164 67,541 are one-time observations contributed during quarterly bioblitz events in 2018/19.

### 165 *1) Contributor behaviour and data upload patterns*

166 The total number of unique contributors with at least one valid phenology observation has been variable  
167 since 2011, with an increase in both individual and schools since 2017 (Fig 1a). The number of consistent  
168 contributors has remained constant and low, since 2011, even though there is an increase in total number



169 of contributors (Fig 1b). The south Indian state of Kerala has the largest number of contributors as well as  
170 the largest number of observations per contributor (Fig 1c).

## 171 2) *Tree behaviour and phenological patterns over time*

172 The species with the most number of observations differed between the two types of observation. 62  
173 species are represented by 100 or more Regular observations and 73 are represented by 100 or more  
174 Casual observations. Five species with the most number of Regular observations are *Artocarpus*  
175 *heterophyllus* Lam. (Jackfruit), *Mangifera indica* L. (Mango), *Tamarindus indica* L. (Tamarind),  
176 *Phyllanthus emblica* L. (Indian gooseberry), and *Cassia fistula* L. (Indian Laburnum, Figure 2a). Five  
177 species with the most number of one-time observations are slightly different: *Tectona grandis* (Teak),  
178 *Cocos nucifera* L. (Coconut palm), *M. indica*, *A. heterophyllus* and *Azadirachta indica* A.Juss. (Neem,  
179 Figure 2b).

180 The seasonal patterns in the appearance of leaf, flower and fruit based on Regular observations are given  
181 in Figure 3(a-d) for the 4 species with the most number of repeated observations. Peaks in flowering and  
182 fruiting are clearly discernible in *M. indica*, *A. heterophyllus* and *T. indica*, but not as apparent in *P.*  
183 *emblica*. The majority of Regular observations are contributed from the south Indian state of Kerala, and  
184 thus the peaks in phenology are most reflective of the seasonal response of trees at these latitudes (8.3218  
185 - 12.7890 degrees N). Sample sizes for these patterns are provided in Appendix 1.

## 186 3) *Flowering phenology of C. fistula*

187 Between 2014 and 2019, we found that up to 40% of trees (on average) of this species were reported to  
188 have open flowers in nearly every week of the year. However, nearly 70% of observed trees on average,  
189 were reported to be in full bloom in the 13th week of the year, indicating a flowering peak. This declined  
190 to 50% of observed trees on average by week 15 (Figure 4). This could be an indication of a shift in  
191 flowering from the expected time of week 15 in the year. Sample sizes for these observations, however,

192 are low and highly variable (weekly ranging from 17 to 124 trees) and more observations are required in  
193 order to determine whether there is indeed a shift from the expected time of flowering in this species.

#### 194 4) *Phenological patterns over space*

195 The number of contributors and observations during 4 bioblitz events was variable, with the maximum  
196 participation in December 2018 and, maximum observations contributed in June 2019 by fewer  
197 contributors (Fig 5a and b). The most reported species from different latitudes varied across the four  
198 bioblitz events and latitudinal patterns could be assessed for only the most widespread, commonly seen  
199 tree species.

200 *Mangifera indica* and *Tectona grandis* were among the top 10 most reported species in all four events,  
201 and we present results for only *M. indica* here. The fruiting phenology of *M. indica* was found to vary  
202 with latitude across 4 different months of assessment (Figure 6). In December 2018 and March 2019, a  
203 small proportion of trees were in fruit, and these were primarily in southern India. In June 2019, trees  
204 were in fruit across all latitudes and by September 2019, fruiting in *M. indica* had receded, with less than  
205 2% of trees in fruit, again restricted to the southernmost latitudes.

#### 206 **Discussion:**

207 Our first description of a long term, India-wide citizen science dataset contributes towards a basic  
208 understanding of seasonal phenology of common, widespread trees. Across temperate latitudes, historical  
209 information on plant phenology has been used as a reference to compare contemporary phenological  
210 changes and also identify climatic correlates of these changes. In the tropics, and especially in India, a  
211 similar baselines for species phenology across latitudes and seasons is lacking (Ramaswami et al 2019).  
212 The citizen science study presented here provides information on four widespread, common tropical  
213 species, which can potentially serve as references for future changes in phenology. For instance, in *A.*

214 *heterophyllus* and *M. indica*, flowering and fruiting peaks in Kerala are well-defined over time, and can  
215 be used to detect shifts in peaks observed in the future.

216 Current phenological patterns can be compared against anecdotal time-points (such as plant phenology  
217 traditionally associated with festivals) in order to assess possible shifts in the reproductive phenology of  
218 culturally important trees. For instance, SeasonWatch data can be used to provide quantitative support to  
219 the anecdotal observations on changes in flowering dates of species such as *C. fistula*. In India, apart from  
220 Vishu, several seasonal festivals are associated with the appearance of flowers on culturally important  
221 tree species. The festival of Holi in north India is associated with flowering in *Butea monosperma* (Lam.)  
222 Taub. (Flame-of-the-forest tree); the flowers of which are collected and used to create a dye used in the  
223 festivities (Anonymous 2015). Similarly, the Kannada new year *Ugadi* and the Tamil harvest festival  
224 *Pongal* are associated with flowering in *Azadirachta indica* (Neem tree).

225 Latitudinal patterns in the vegetative and reproductive phenology of widespread and abundant species  
226 can help discern the range of underlying environmental factors affecting the appearance of phenophases.  
227 In temperate regions, there is typically a negative relationship between autumn phenology and latitude,  
228 with northern populations showing the appearance of phenophases such as leaf colour-change and leaf-  
229 fall before southern populations. For eg, in Japan, the timing of fall-leaf phenology was found to be  
230 negatively associated with latitude and temperature in the temperate species *Acer palmatum* and *Gingko*  
231 *biloba* over the duration of 53 years (Doi et al 2008). . In tropical regions, on the other hand, where spring  
232 and autumn temperature changes are not as stark as in temperate latitudes, vegetative phenology such as  
233 leaf-out may be triggered, instead, by photoperiod or preceding the onset of monsoons across different  
234 latitudes (Adole et al., 2019; Elliott et al., 2006; Ryan et al., 2017). In SeasonWatch, however, we were  
235 unable to detect any changes in vegetative phenology with latitude due to the large time-gaps between  
236 consecutive bioblitz assessments. Reproductive phenology is also associated with latitude in temperate  
237 regions, with some herbaceous species such as *Lythrum salicaria* exhibiting growth and flowering  
238 phenology earlier in northern latitudes (Olssen et al 2002). In other species, such as *Crataegus monogyna*,

239 the opposite pattern has been reported, with southern populations showing fruiting phenology before  
240 northern populations (Guitian 1998). *M. indica*, shows the latter pattern, with southern populations  
241 showing reproductive phenophases before the northern populations, indicating a possible link with the  
242 Indian monsoon. In SeasonWatch, *M. indica* includes cultivated varieties as well, which may have  
243 variety-specific fruiting phenology.

244 The initial description of tropical tree phenology merits further investigation in terms of underlying  
245 environmental correlates, such as temperature, precipitation, and photoperiod. Given the large spatial  
246 skew in SeasonWatch data, correlational inferences at the scale of the country are likely to be affected by  
247 high variability. There is a better scope, however, for exploring temporal patterns of environmental  
248 changes on tree phenology, at least from the state of Kerala, with the addition of a few more years of data.  
249 A future research question could be addressing the changes in tree phenology in relation to changing  
250 climate. Overall changes in tropical tree phenology are expected to cascade through trophic levels. At  
251 present the effects of phenological change in tropical tree species from the Indian subcontinent on the life  
252 cycles of animals is poorly known. A research question that emerges thus, is, what are the downstream  
253 trophic impacts of tree phenology and what changes are likely to occur in these interactions given climate  
254 change.

## 255 **Conclusion:**

256 Citizen science has the potential to contribute immensely to mainstream scientific understanding of  
257 tropical tree phenology via building baselines. However, a citizen science project such as SeasonWatch  
258 faces several challenges, including - ensuring sufficient sample sizes per species per season from different  
259 locations, as well as data quality and accuracy. Managing these challenges is especially difficult in the  
260 Indian context given the high diversity of languages and the unequal access to the internet, as well as  
261 mass and social media, and at times literacy. It is therefore not possible to sustain such programmes  
262 without initiating and maintaining long-term partnerships with regional groups and organisations. Despite

263 increasing outreach in multiple languages to promote awareness about the project, providing  
264 technological support free of cost for contributors, and simple visual design of the user interface created  
265 by taking inputs from contributors during the testing stage, data quantity remains low and skewed to a  
266 single state in the country. Furthermore, mechanisms to ensure data quality need to be implemented at  
267 multiple stages of data contribution. With this paper, we extend a call for action to sustain long-term  
268 interest and participation to develop a baseline for common tropical tree species that can be used to  
269 understand long-term consequences of climate change on tropical tree phenology.

270

## 271 **Acknowledgements**

272

273 We thank the numerous citizen scientists from across India and especially Kerala who have tirelessly  
274 contributed data to the SeasonWatch project, making this description possible. Project funding for the  
275 duration of the study came from Wipro Foundation. Muhammad Nizar, regional coordinator for Kerala  
276 and regional partners Mathrubhumi have ensured that citizen scientists engage with and contribute to the  
277 programme regularly. Veena HT and Farheen Anjum have created the SeasonWatch website and Android  
278 app that contributors use to upload data.

279

## 280 **References**

281 Adole, T., Dash, J., Rodriguez-Galiano, V., & Atkinson, P. M. (2019). Photoperiod controls vegetation  
282 phenology across Africa. *Communications Biology*, 2(1), 1–13. [https://doi.org/10.1038/s42003-019-0636-](https://doi.org/10.1038/s42003-019-0636-7)

283 7

284

285 Anonymous (2015) Flame that cools: Long-forgotten palash flower helps beat the heat, offers health  
286 benefits. DownToEarth. <https://www.downtoearth.org.in/news/food/flame-that-cools-38445>

- 287 Aono, Y., & Kazui, K. (2008). Phenological data series of cherry tree flowering in Kyoto, Japan, and its  
288 application to reconstruction of springtime temperatures since the 9th century. *International Journal of*  
289 *Climatology*, 28(7), 905–914. <https://doi.org/10.1002/joc.1594>
- 290 Babweteera, F., Plumptre, A. J., Adamescu, G. S., Shoo, L. P., Beale, C. M., Reynolds, V., Nyeko, P., &  
291 Muhanguzi, G. (2018). The ecology of tree reproduction in an African medium altitude rain forest.  
292 *Biotropica*, 50(3), 405–417. <https://doi.org/10.1111/btp.12563>
- 293 Bertin, R. I. (2008). Plant Phenology And Distribution In Relation To Recent Climate Change. *The*  
294 *Journal of the Torrey Botanical Society*, 135(1), 126–146. <https://doi.org/10.3159/07-rp-035r.1>
- 295 Chapman, C. A., Valenta, K., Bonnell, T. R., Brown, K. A., & Chapman, L. J. (2018). Solar radiation and  
296 ENSO predict fruiting phenology patterns in a 15-year record from Kibale National Park, Uganda.  
297 *Biotropica*, 50(3), 384–395. <https://doi.org/10.1111/btp.12559>
- 298 Chen, Y., Wang, X., Jiang, B., Yang, N., & Li, L. (2016). Pavement induced soil warming accelerates leaf  
299 budburst of ash trees. *Urban Forestry and Urban Greening*, 16, 36–42.  
300 <https://doi.org/10.1016/j.ufug.2016.01.014>
- 301 Cleland, E. E., Chuine, I., Menzel, A., Mooney, H. A., & Schwartz, M. D. (2007). Shifting plant  
302 phenology in response to global change. In *Trends in Ecology and Evolution* (Vol. 22, Issue 7, pp. 357–  
303 365). Elsevier Current Trends. <https://doi.org/10.1016/j.tree.2007.04.003>
- 304 Doi, H., & Takahashi, M. (2008). Latitudinal patterns in the phenological responses of leaf colouring and  
305 leaf fall to climate change in Japan. *Global Ecology and Biogeography*, 17(4), 556–561.  
306 <https://doi.org/10.1111/j.1466-8238.2008.00398.x>

- 307 Dickinson, J.L., Shirk, J., Bonter, D., Bonney, R., Crain, R.L., Martin, J., Phillips, T., and Purcell, K.  
308 (2012). The current state of citizen science as a tool for ecological research and public engagement.  
309 *Frontiers in Ecology and the Environment* 10, 291–297.  
310 DOI: [10.1890/110236](https://doi.org/10.1890/110236)
- 311 Dunham, A. E., Razafindratsima, O. H., Rakotonirina, P., & Wright, P. C. (2018). Fruiting phenology is  
312 linked to rainfall variability in a tropical rain forest. *Biotropica*, 50(3), 396–404.  
313 <https://doi.org/10.1111/btp.12564>
- 314 Elliott, S., Baker, P. J., & Borchert, R. (2006). Leaf flushing during the dry season: the paradox of Asian  
315 monsoon forests. *Global Ecology and Biogeography*, 15(3), 248–257. [https://doi.org/10.1111/j.1466-](https://doi.org/10.1111/j.1466-8238.2006.00213.x)  
316 [8238.2006.00213.x](https://doi.org/10.1111/j.1466-8238.2006.00213.x)
- 317
- 318 Ffrench-Constant, R. H., Somers-Yeates, R., Bennie, J., Economou, T., Hodgson, D., Spalding, A., &  
319 McGregor, P. K. (2016). Light pollution is associated with earlier tree budburst across the United  
320 Kingdom. *Proceedings of the Royal Society B: Biological Sciences*, 283(1833).  
321 <https://doi.org/10.1098/rspb.2016.0813>
- 322 Fu, Y. H., Campioli, M., Deckmyn, G., & Janssens, I. A. (2012). The Impact of Winter and Spring  
323 Temperatures on Temperate Tree Budburst Dates: Results from an Experimental Climate Manipulation.  
324 *PLoS ONE*, 7(10), e47324. <https://doi.org/10.1371/journal.pone.0047324>
- 325 Guitián, P. (1998). Latitudinal variation in the fruiting phenology of a bird-dispersed plant (*Crataegus*  
326 *monogyna*) in Western Europe. *Plant Ecology*, 137(2), 139–142.  
327 <https://doi.org/10.1023/A:1009712000104>
- 328 Kimura A.H. and Kinchy A. (2016). Citizen Science: Probing the virtues and contexts of participatory  
329 research. *Engaging Science, Technology, and Society* 2 (2016), 331-361. DOI:10.17351/ests2016.099

- 330 Kushwaha, C. P., & Singh, K. P. (2008). India needs phenological stations network. In *Current Science*  
331 (Vol. 95, pp. 832–834). Current Science Association. <https://doi.org/10.2307/24103172>
- 332 Mendoza, I., Condit, R. S., Wright, S. J., Caubère, A., Châtelet, P., Hardy, I., & Forget, P. M. (2018).  
333 Inter-annual variability of fruit timing and quantity at Nouragues (French Guiana): insights from  
334 hierarchical Bayesian analyses. *Biotropica*, 50(3), 431–441. <https://doi.org/10.1111/btp.12560>
- 335 Menzel, A., Sparks, T., Estrella, N., Koch, E., Aasa, A., Ahas, R., ... Züst, A. (2006). European  
336 phenological response to climate change matches the warming pattern. *Global Change Biology*, 12(10),  
337 1969–1976. <https://doi.org/10.1111/j.1365-2486.2006.01193.x>  
338
- 339 Morisette, J.T., Richardson, A.D., Knapp, A.K., Fisher, J.I., Graham, E.A., Abatzoglou, J.T., Wilson,  
340 B.E., Breshears, D.D., Henebry, G.M., Hanes, J.M., & Liang, L. (2009). Tracking the rhythm of the  
341 seasons in the face of global change: phenological research in the 21st century. *Front Ecol Environ*; 7(5):  
342 253–260, doi:10.1890/070217
- 343 Olsson, K., & Ågren, J. (2002). Latitudinal population differentiation in phenology, life history and  
344 flower morphology in the perennial herb *Lythrum salicaria*. *Journal of Evolutionary Biology*, 15(6), 983–  
345 996. <https://doi.org/10.1046/j.1420-9101.2002.00457.x>
- 346 Prevéy, J. S., Parker, L. E., Harrington, C. A., Lamb, C. T., & Proctor, M. F. (2020). Climate change  
347 shifts in habitat suitability and phenology of huckleberry (*Vaccinium membranaceum*). *Agricultural and*  
348 *Forest Meteorology*, 280. <https://doi.org/10.1016/j.agrformet.2019.107803>
- 349 Ramaswami, G., Datta, A., Reddy, A., & Quader, S. (2019). Tracking Phenology in the Tropics and in  
350 India: The Impacts of Climate Change. In J. Bhatt, A. Das, P. Hari Haran, & K. Shanker (Eds.), *The*  
351 *Implications of Climate Change for Indian Biodiversity: An Overview* (pp. 45–59).



- 352 Ryan, C. M., Williams, M., Grace, J., Woollen, E., & Lehmann, C. E. R. (2017). Pre-rain green-up is  
353 ubiquitous across southern tropical Africa: implications for temporal niche separation and model  
354 representation. *New Phytologist*, 213(2), 625–633. <https://doi.org/10.1111/nph.14262>  
355
- 356 Schwartz M.D., Julio L. Betancourt, and Jake F. Weltzin (2012). From Caprio's lilacs to the USA  
357 National Phenology Network. *Frontiers in Ecology and the Environment*. Vol. 10: 324-327. DOI:  
358 10.1890/110281  
359
- 360 Sparks T.H. and Carey P. D. (1995) The Responses of Species to Climate Over Two Centuries: An  
361 Analysis of the Marsham Phenological Record, 1736-1947. *Journal of Ecology*, Vol. 83, No. 2 (Apr.,  
362 1995), pp. 321-329.  
363
- 364 Wiggins, A., and Crowston, K. (2011). From conservation to crowdsourcing: A typology of citizen  
365 science. In *Proceedings of the Annual Hawaii International Conference on System Sciences*.  
366 <https://doi.org/10.1109/HICSS.2011.207>
- 367 Wright, S. J., & Calderón, O. (2018). Solar irradiance as the proximate cue for flowering in a tropical  
368 moist forest. *Biotropica*, 50(3), 374–383. <https://doi.org/10.1111/btp.12522>

## Figures

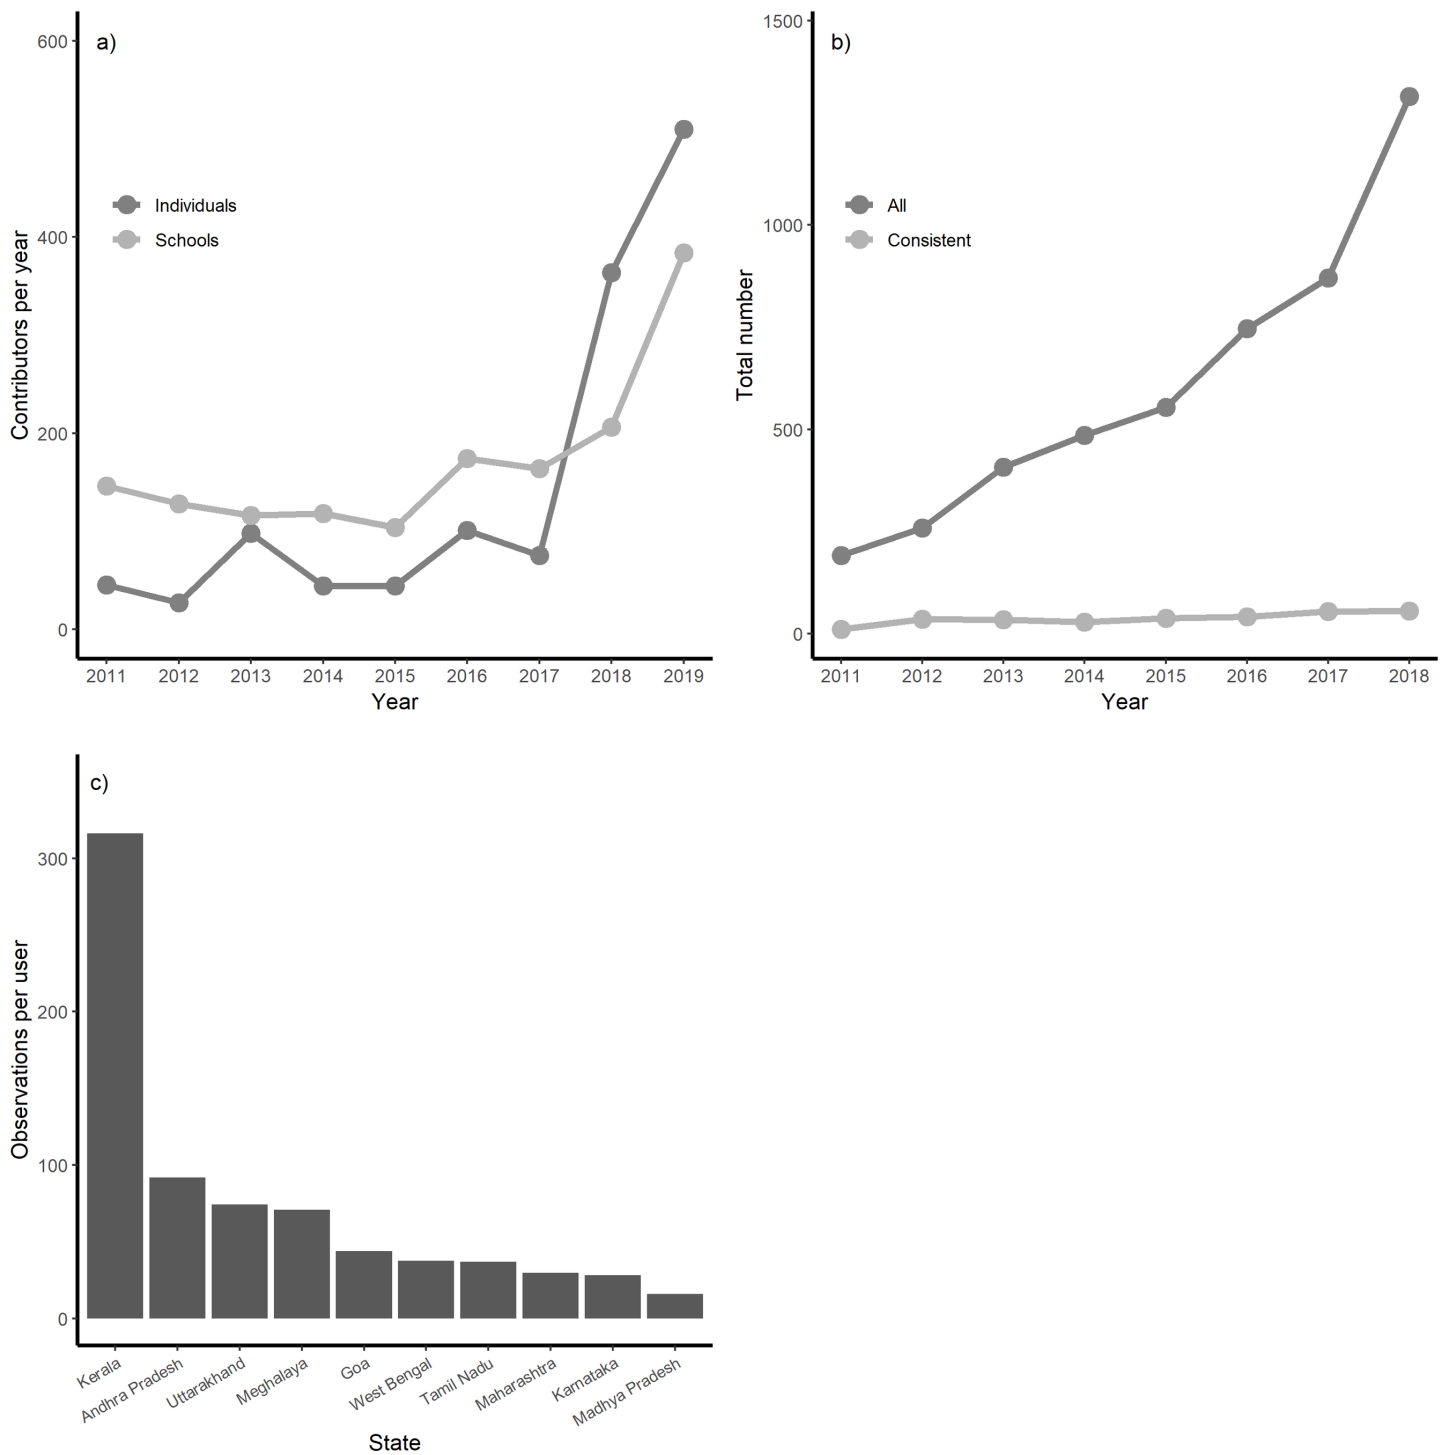

Fig 1: Contributor behaviour over time. a) number of schools and individuals with at least one valid phenology observation between 1 January 2014 and 31 December 2019. b) Number of contributors added per year and number of consistent contributors with at least one observation made in at least 23 weeks of the year. c) per-contributor average number of observations from different states of India

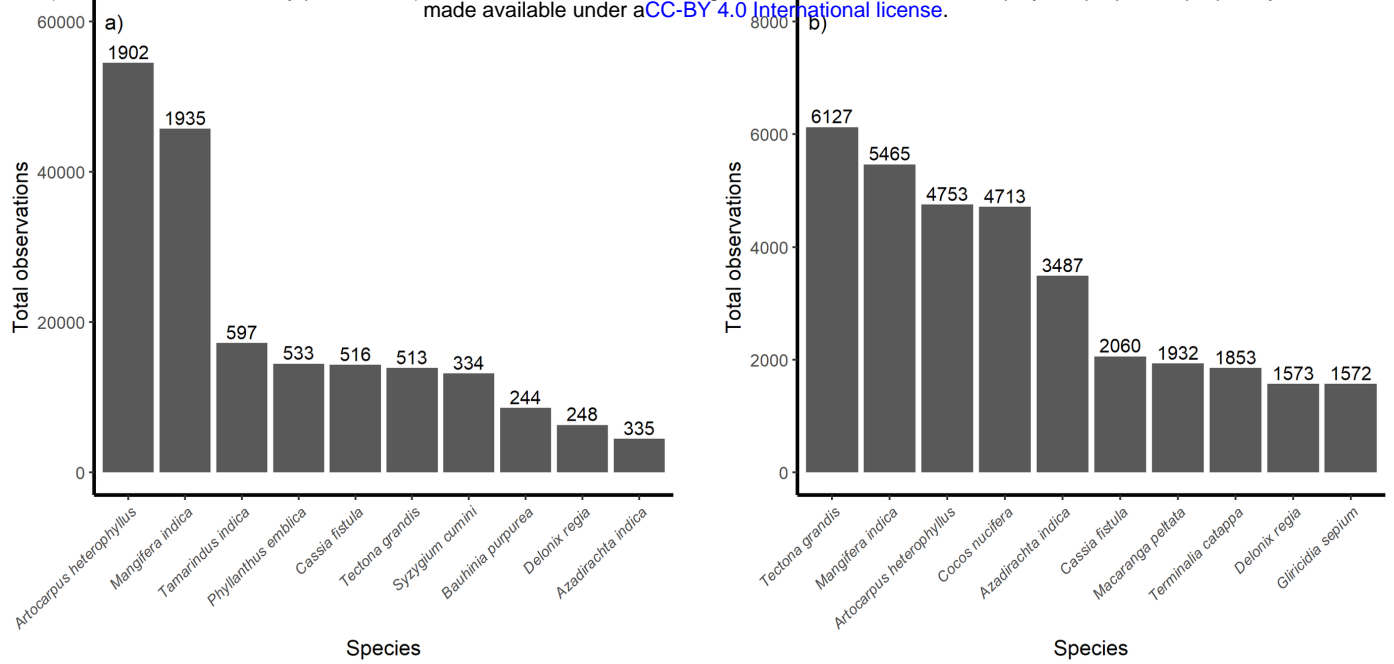

Fig 2: Total number of observations per species from 1 January 2014 to 31 December 2019. a) 'Regular' observations are repeat observations on registered trees; numbers on top of the bars indicate the number of registered individual trees for that species across India. b) 'Casual' observations are made once on any individual tree; number of observations is thus, the same as the number of individual trees observed, assuming that every casual observation is made on a different tree

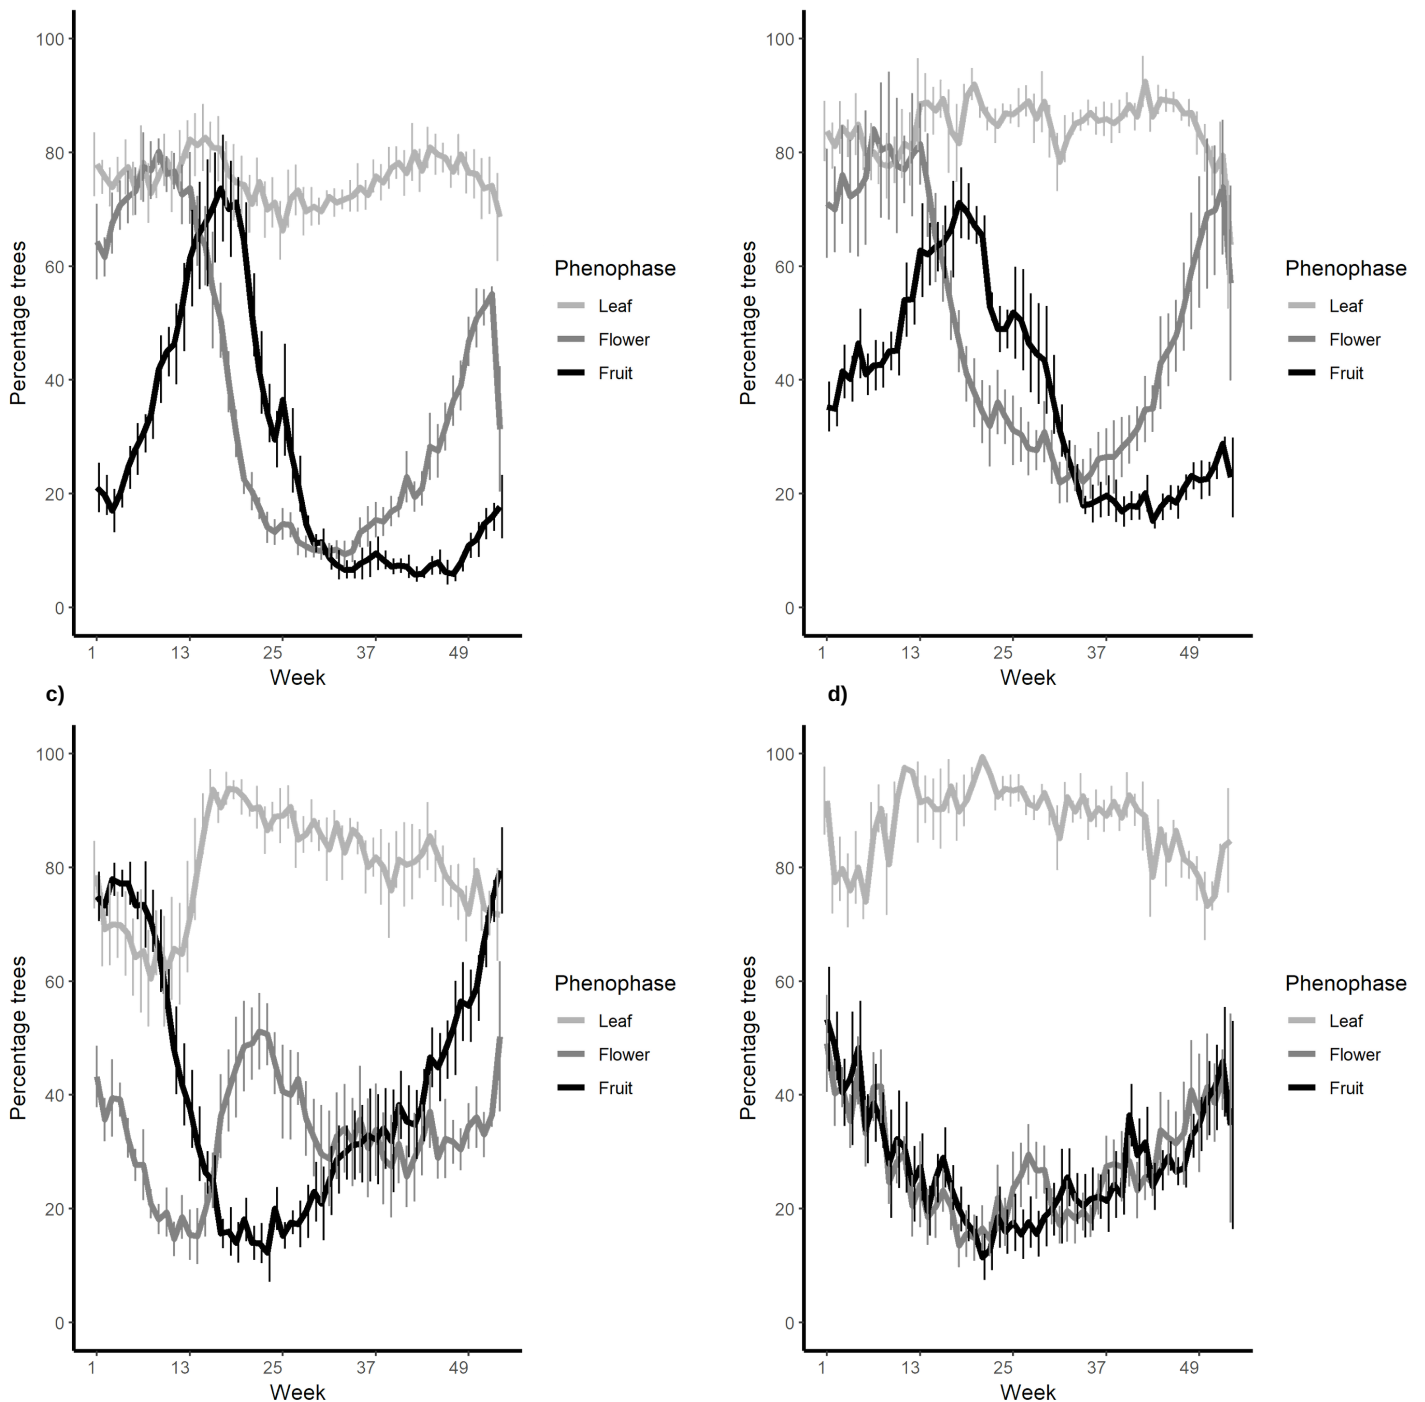

Figure 3: Phenology of four most observed species across India. a) *Mangifera indica*, b) *Artocarpus heterophyllus* and c) *Tamarindus indicus* show clear seasonal peaks in flowering and fruiting, while d) *Phyllanthus emblica* shows moderate, persistent flowering and fruiting through the year. Bars indicate standard error across 5 years, sample sizes for these patterns are given in Appendix 1.

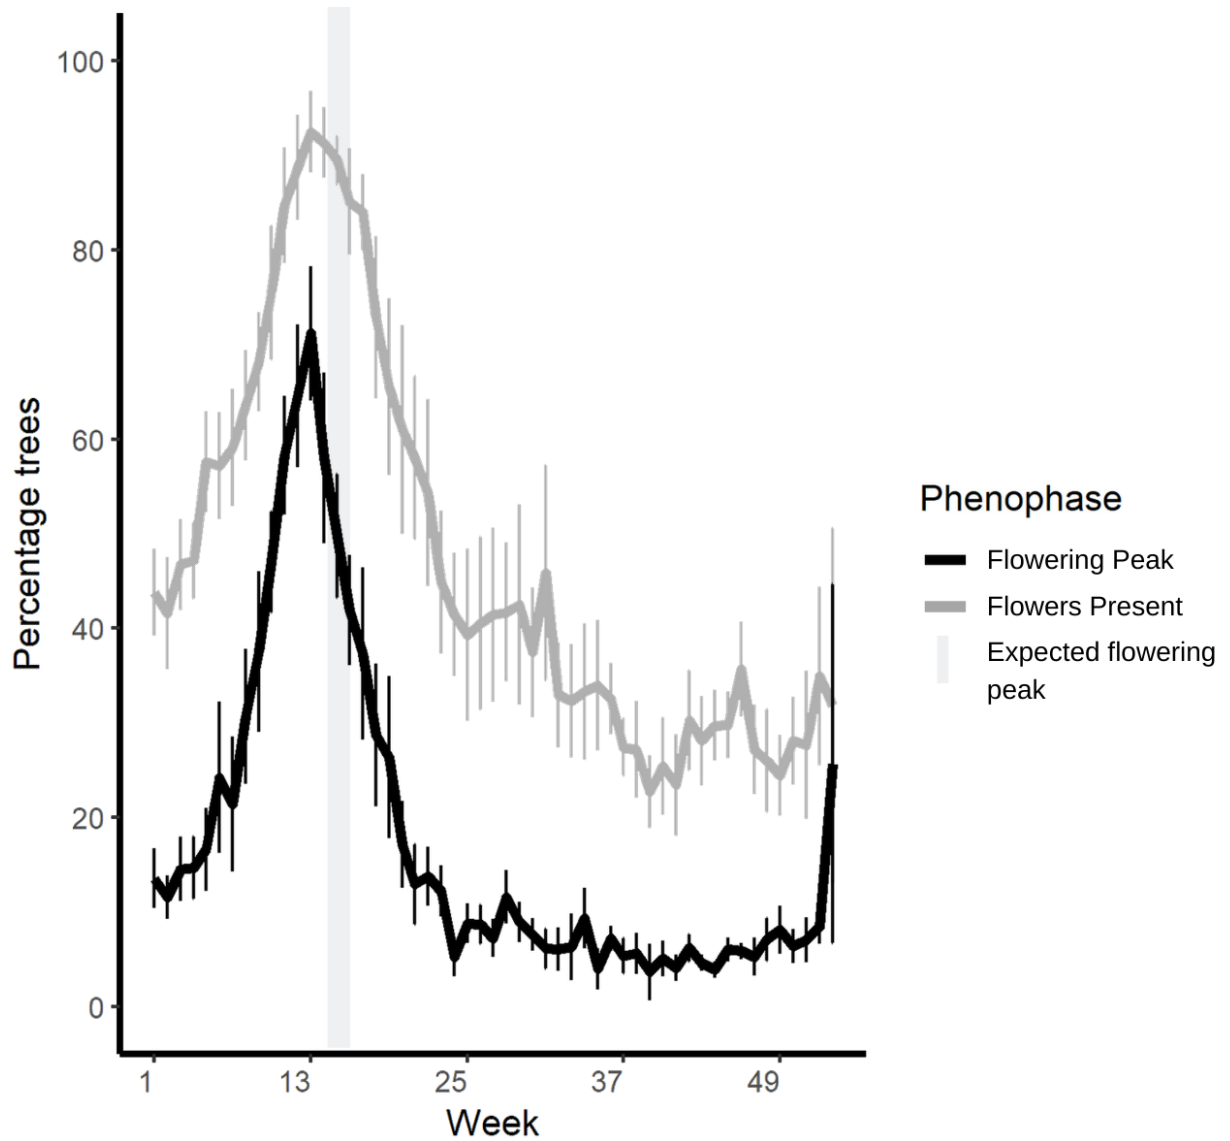

Figure 4: Proportion trees with phenophase indicated as 'present' or 'many' (indicating a perception of phenophase peak by the contributor). Flowering in *Cassia fistula* compared against the expected peak flowering time indicated by the cultural festival of Vishu in Kerala.

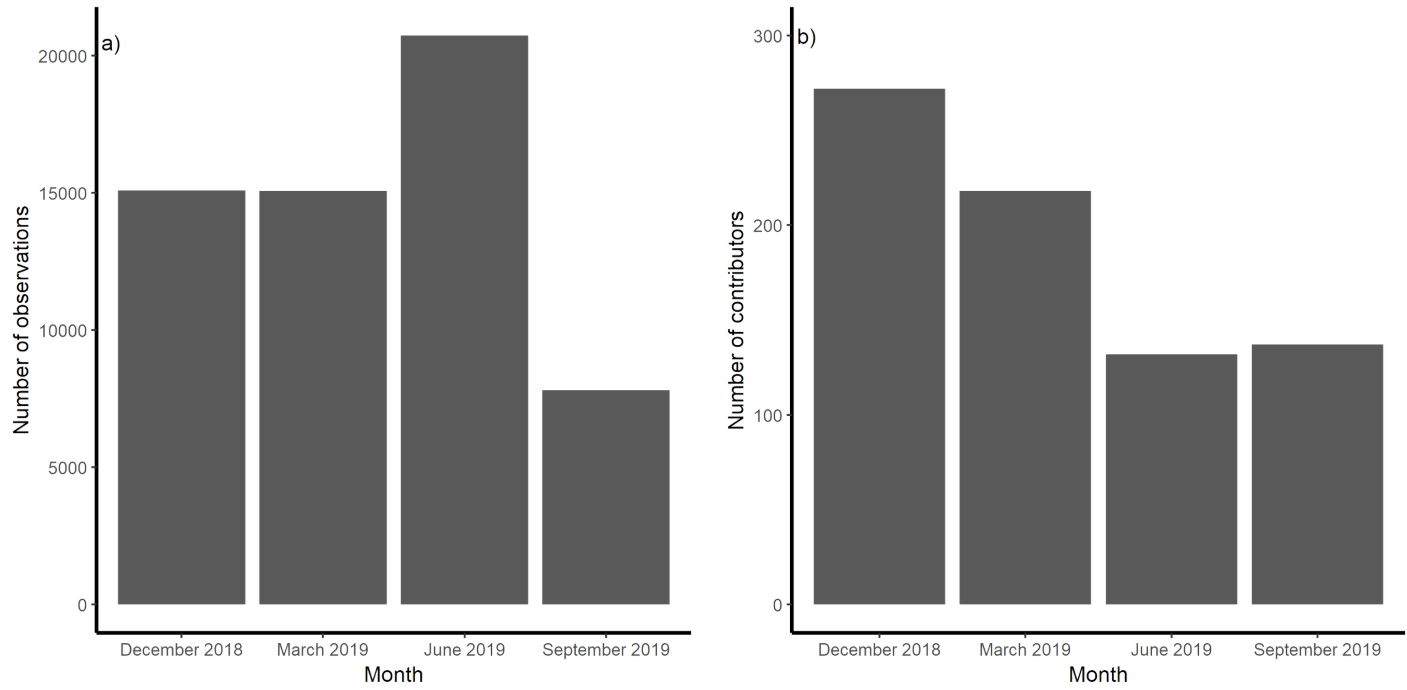

Figure 5: Number of observations (a) and number of participating contributors (b) in four bioblitz events held across India between December 2018 and September 2019.

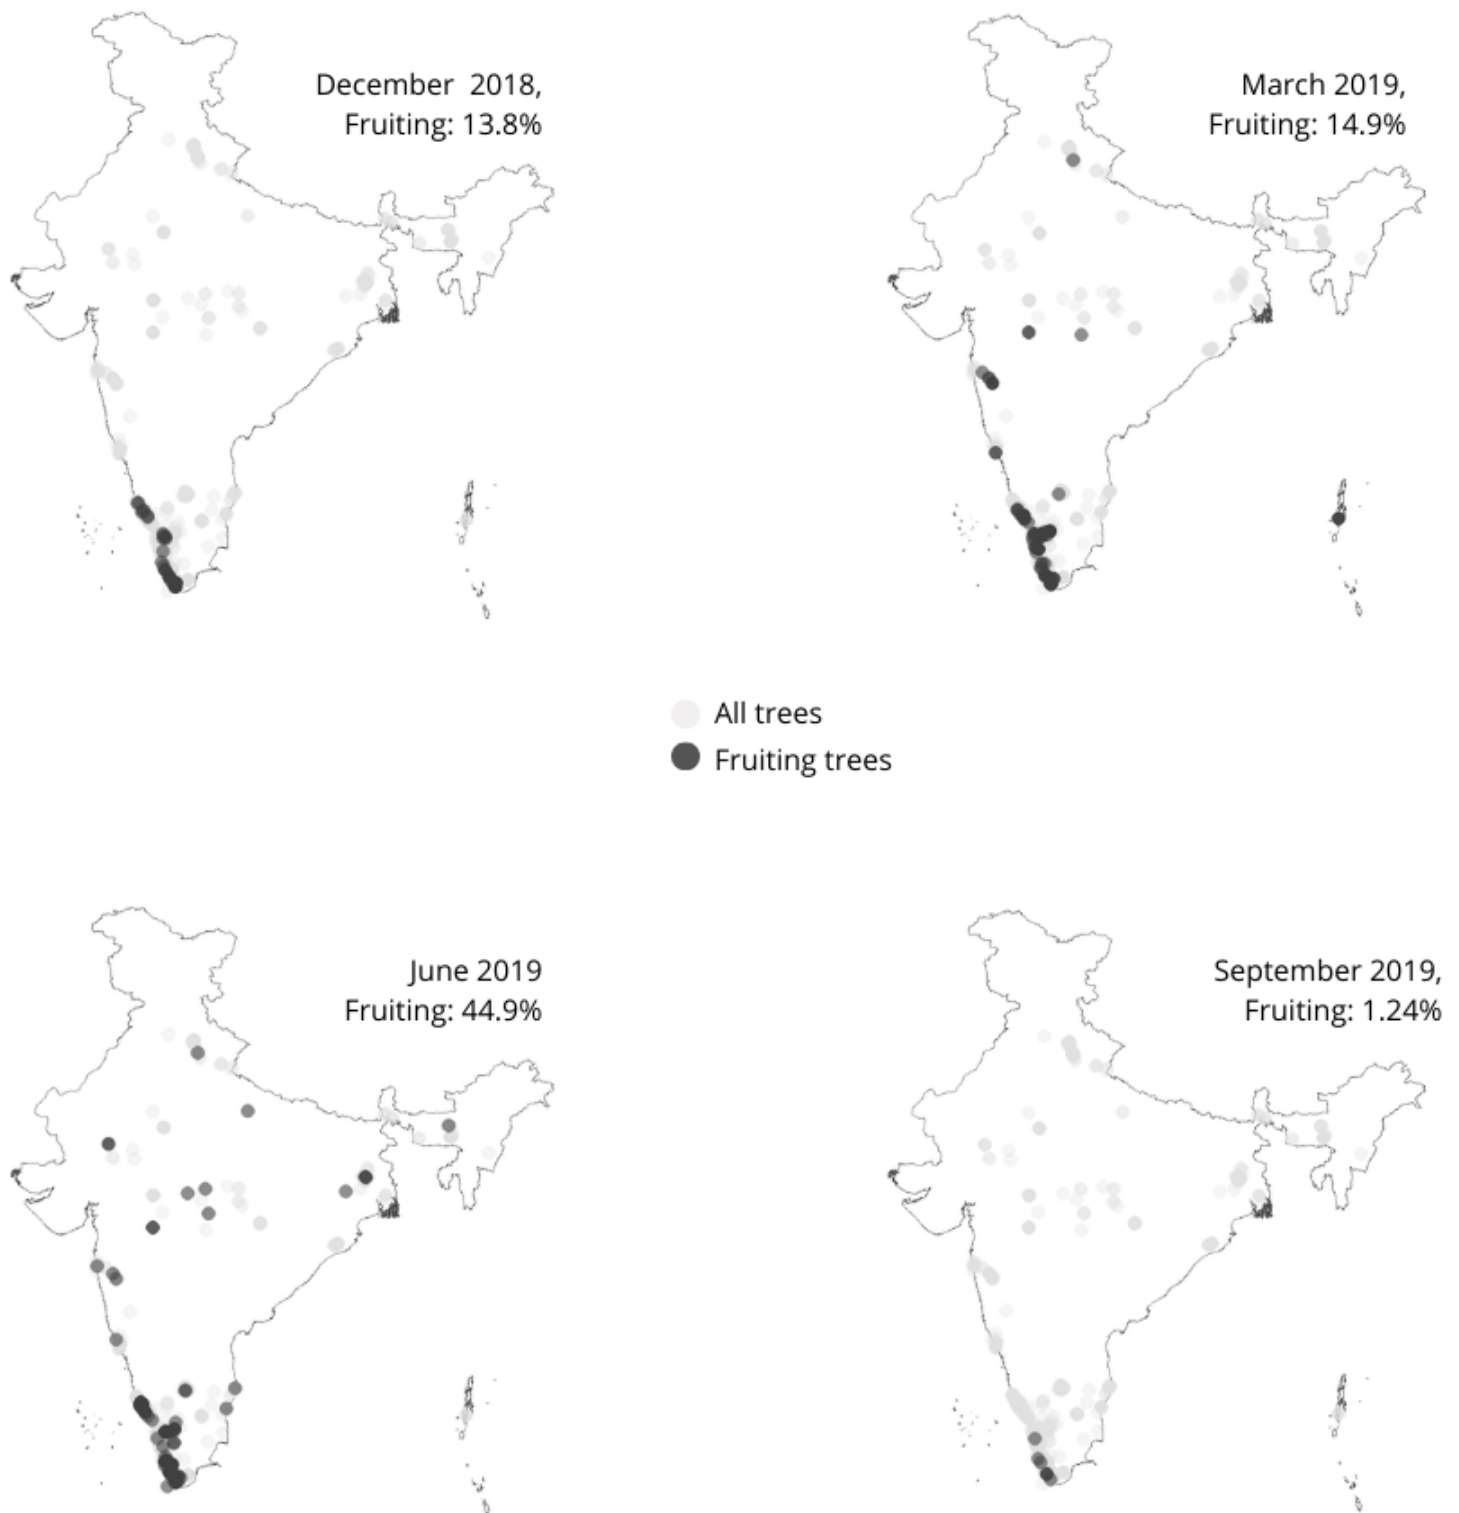

Figure 6: Spatial variation in the fruiting phenology of *Mangifera indica* (all varieties) as recorded during 4 bioblitz events in India. The south-western part of the country shows the presence of fruits on trees nearly all through the year, while fruiting is much more seasonal (between March and June) in central and northern India

## Appendix 1

Number of trees observed per species per week varies throughout the year. The patterns reported for species in Fig 3 are thus based on varying sample sizes per week. Lowest number of trees observed are usually between weeks 10 and 30 of the year - coinciding with summer holidays in schools in southern India. Sample sizes are as follows for these species; note that Y axis values vary - a) *Mangifera indica*, b) *Artocarpus heterophyllus*, c) *Tamarindus indicus* and d) *Phyllanthus emblica*. Note that though the overall sample sizes for all species seem to fluctuate nearly exactly, total trees observed (Y axis) differs with species, with most number of trees observed for *A. heterophylla* and the least for *P. emblica*

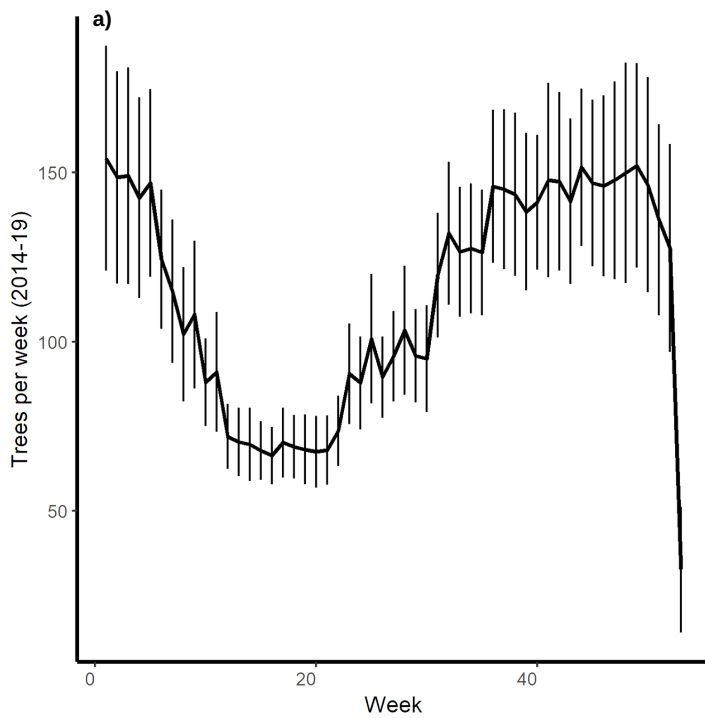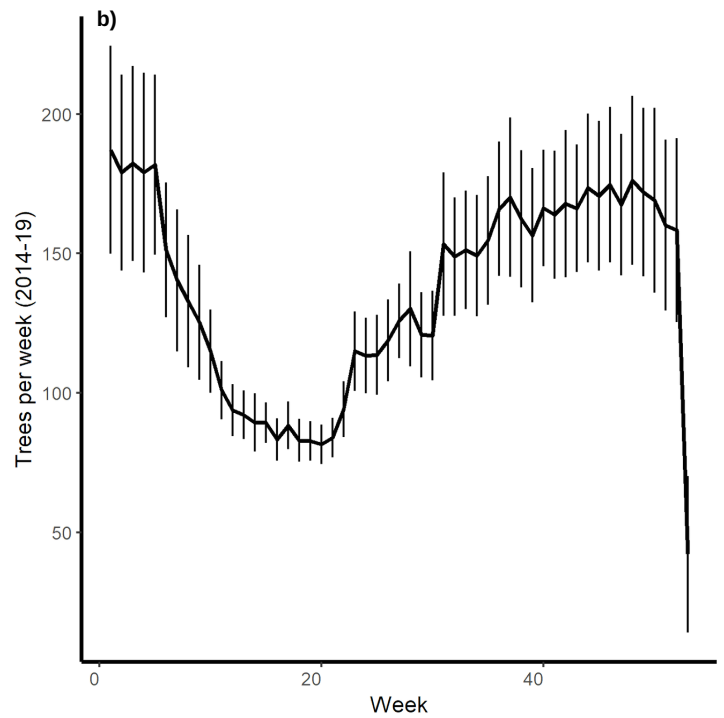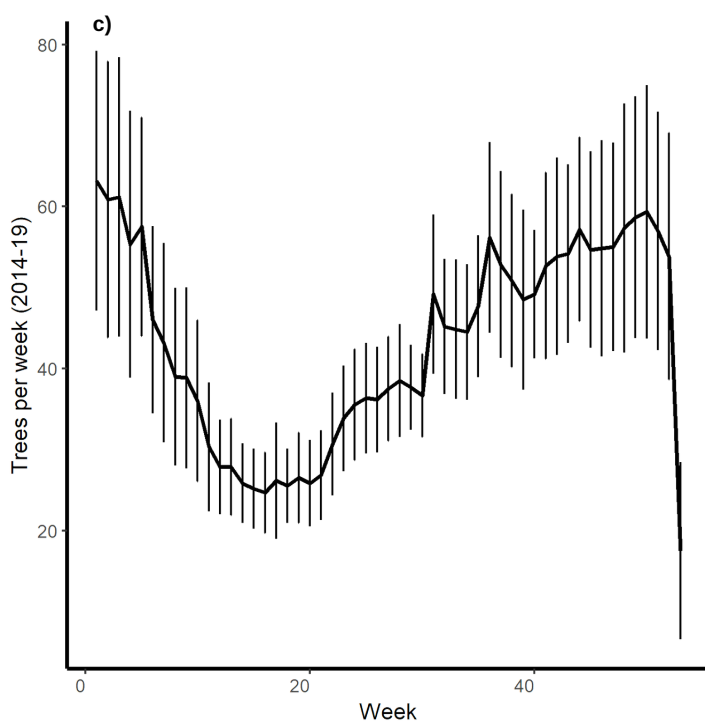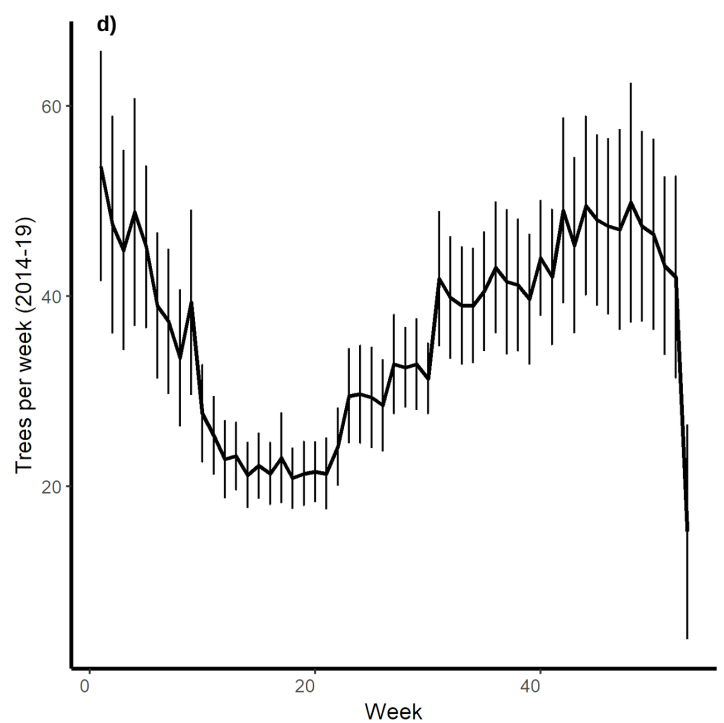

Source: https://www.biorxiv.org/content/10.1101/2020.08.28.271155v1.full.pdf
